# Supplementary material for: circABCB10 Promotes Malignant Progression of Gastric Cancer Cells by Preventing the Degradation of MYC
Source: Hindawi journal article supplement (doi:10.1155/2021/4625033), 2021-12-14

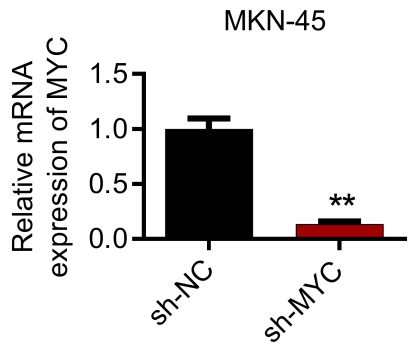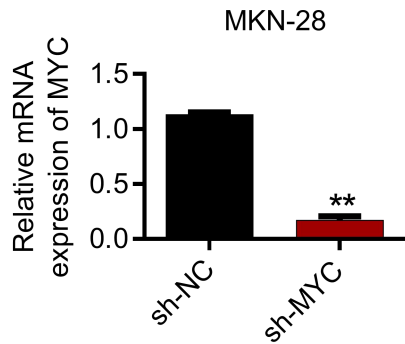

Supplement: f1 [file 4625033.f1.pdf]
